# Supplementary material
Source: publisher figshare collection journal article supplement (https://acs.figshare.com/ndownloader/files/4405411)
Supplement: Supplementary file 1 [file 4405411]

## Supporting Information

# A periodic orbit bifurcation analysis of vibrationally excited isotopologues of sulphur dioxide and water molecules: symmetry breaking substitutions

Frederic Mauguere,<sup>\*,†</sup> Michael Rey,<sup>†</sup> Vladimir Tyuterev,<sup>†</sup> Jaime Suarez,<sup>‡</sup> and Stavros C. Farantos<sup>‡</sup>

*University of Reims, GSMA, Moulin de la Housse, B.P. 1039, 51067 Reims, France, Institute of Electronic Structure and Laser, Foundation for Research and Technology-Hellas (FORTH), PO Box 1527, Vasilika Vouton, Heraklion 71110, Crete, Greece, and Department of Chemistry, University of Crete, PO Box 2208, Vasilika Vouton, Heraklion 71305, Crete, Greece*

E-mail: fredmaug@iesl.forth.gr

---

<sup>†</sup>University of Reims, GSMA, Moulin de la Housse, B.P. 1039, 51067 Reims, France

<sup>‡</sup>Institute of Electronic Structure and Laser, Foundation for Research and Technology-Hellas (FORTH), PO Box 1527, Vasilika Vouton, Heraklion 71110, Crete, Greece

<sup>¶</sup>Department of Chemistry, University of Crete, PO Box 2208, Vasilika Vouton, Heraklion 71305, Crete, Greece

Figure 1: Vibrational overtone and combination states of  $\text{SO}_2$ . States (21,0,0) and (20,0,1) are superimposed with the corresponding POs.

|                                                                                                             |                                                                                                             |                                                                                                             |                                                                                                             |                                                                                                             |                                                                                                               |                                                                                                               |
|-------------------------------------------------------------------------------------------------------------|-------------------------------------------------------------------------------------------------------------|-------------------------------------------------------------------------------------------------------------|-------------------------------------------------------------------------------------------------------------|-------------------------------------------------------------------------------------------------------------|---------------------------------------------------------------------------------------------------------------|---------------------------------------------------------------------------------------------------------------|
| (1,0,0)<br><br>1151.69     | (2,0,0)<br><br>2295.81     | (3,0,0)<br><br>3432.36     | (4,0,0)<br><br>4561.32     | (5,0,0)<br><br>5682.69     | (6,0,0)<br><br>6796.45     | (7,0,0)<br><br>7902.60     |
|                                                                                                             | (1,0,1)<br><br>2499.85     | (2,0,1)<br><br>3629.77     | (3,0,1)<br><br>4751.80     | (4,0,1)<br><br>5865.90     | (5,0,1)<br><br>6972.05     | (6,0,1)<br><br>8070.19     |
| (8,0,0)<br><br>9001.10     | (9,0,0)<br><br>10091.93    | (10,0,0)<br><br>11175.04   | (11,0,0)<br><br>12250.38   | (12,0,0)<br><br>13317.86   | (13,0,0)<br><br>14377.38   | (14,0,0)<br><br>15428.79   |
| (7,0,1)<br><br>9160.27     | (8,0,1)<br><br>10242.23    | (9,0,1)<br><br>11315.97    | (10,0,1)<br><br>12381.38   | (11,0,1)<br><br>13438.34   | (12,0,1)<br><br>14486.67   | (13,0,1)<br><br>15526.15   |
| (15,0,0)<br><br>16471.79  | (16,0,0)<br><br>17506.04  | (17,0,0)<br><br>18530.91  | (18,0,0)<br><br>19545.41  | (19,0,0)<br><br>20547.95  | (20,0,0)<br><br>21536.35  | (21,0,0)<br><br>22508.47  |
| (14,0,1)<br><br>16556.48 | (15,0,1)<br><br>17577.30 | (16,0,1)<br><br>18588.09 | (17,0,1)<br><br>19587.72 | (18,0,1)<br><br>20577.73 | (19,0,1)<br><br>21554.41 | (20,0,1)<br><br>22518.15 |

Figure 2: Vibrational overtone stretching states of  $^{16}\text{O}^{18}\text{O}$ . States (20,0,0) and (0,0,17) are superimposed with the corresponding periodic orbits .

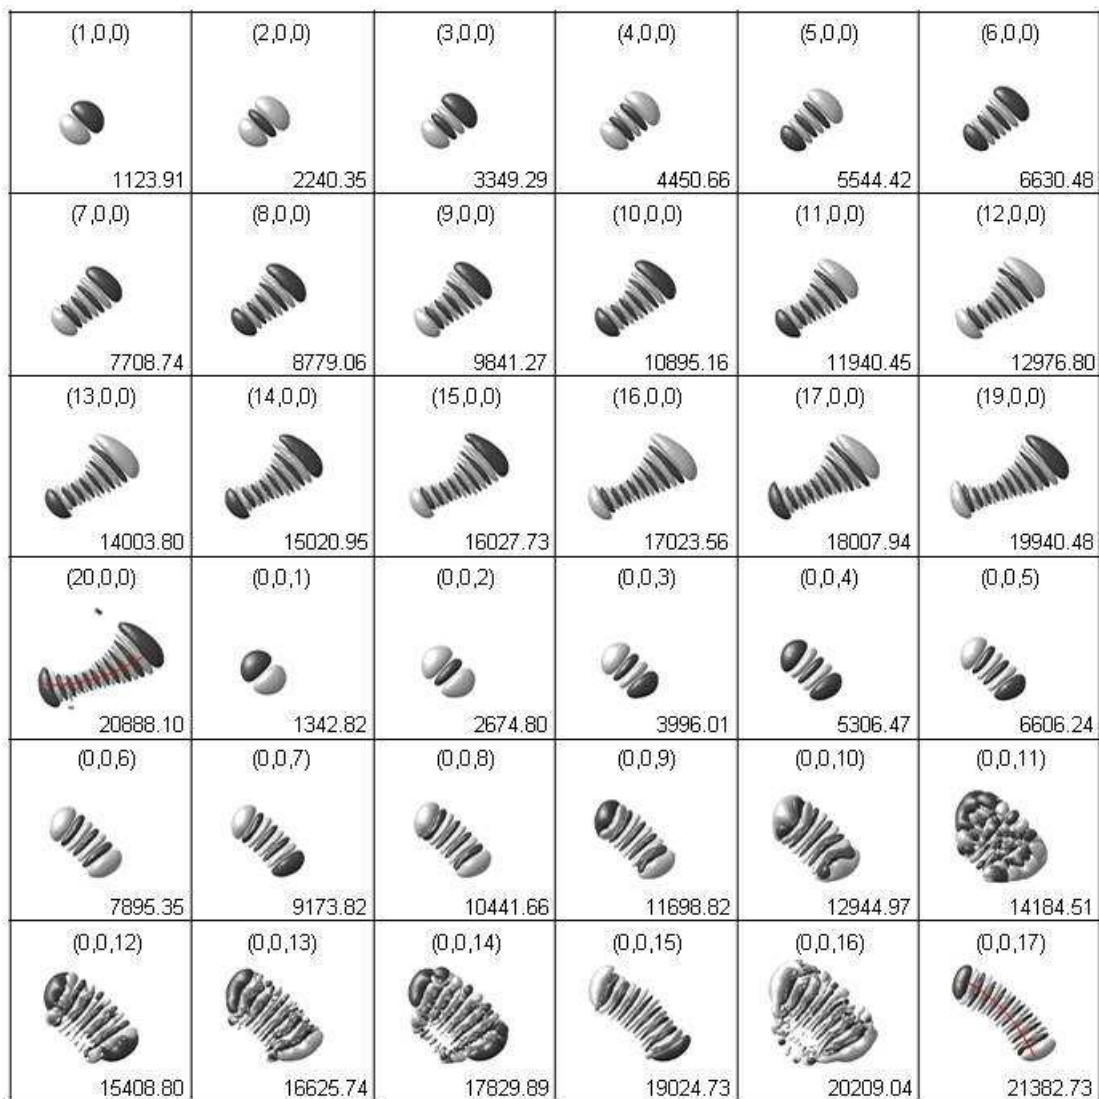

Figure 3: Vibrational doublet states of H<sub>2</sub>O. States (8,0,0)/[8,0]<sub>+,0</sub>, (14,0,0)/[14,0]<sub>+,0</sub> and (13,0,1)/[14,0]<sub>-,0</sub> are superimposed with the corresponding periodic orbits.

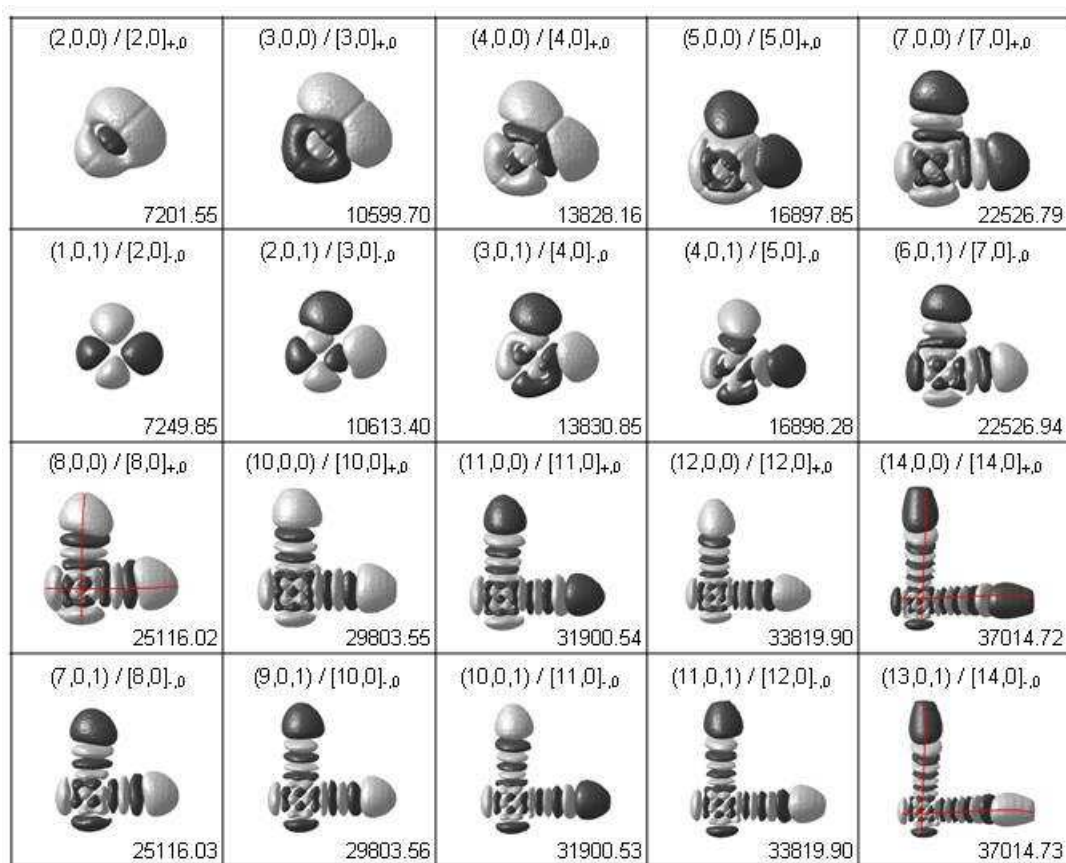

Figure 4: Vibrational overtone stretching states of HOD. States  $(12,0,0)$ ,  $(16',0,0)$ ,  $(17',0,0)$ ,  $(13'',0,0)$ ,  $(14'',0,0)$ ,  $(15'',0,0)$  and  $(0,0,11')$  are superimposed with the corresponding periodic orbits.

|                                                                                                                |                                                                                                                 |                                                                                                                 |                                                                                                                 |                                                                                                                  |
|----------------------------------------------------------------------------------------------------------------|-----------------------------------------------------------------------------------------------------------------|-----------------------------------------------------------------------------------------------------------------|-----------------------------------------------------------------------------------------------------------------|------------------------------------------------------------------------------------------------------------------|
| $(1,0,0)$<br><br>2723.41      | $(2,0,0)$<br><br>5363.29       | $(3,0,0)$<br><br>7917.47       | $(4,0,0)$<br><br>10378.13      | $(5,0,0)$<br><br>12765.94     |
| $(6,0,0)$<br><br>15064.29     | $(7,0,0)$<br><br>17280.14      | $(8,0,0)$<br><br>19412.30      | $(9,0,0)$<br><br>21461.47      | $(11,0,0)$<br><br>25312.00    |
| $(12,0,0)$<br><br>27120.66  | $(13',0,0)$<br><br>28816.47  | $(14',0,0)$<br><br>30448.61  | $(15',0,0)$<br><br>31992.43  | $(16',0,0)$<br><br>33444.83 |
| $(17',0,0)$<br><br>34804.66 | $(13'',0,0)$<br><br>28950.07 | $(14'',0,0)$<br><br>30743.02 | $(15'',0,0)$<br><br>32467.85 | $(0,0,1)$<br><br>3707.91    |
| $(0,0,2)$<br><br>7251.35    | $(0,0,3)$<br><br>10632.74    | $(0,0,4)$<br><br>13854.68    | $(0,0,5)$<br><br>16920.68    | $(0,0,6)$<br><br>19836.57   |
| $(0,0,7)$<br><br>22623.73   | $(0,0,8')$<br><br>25329.61   | $(0,0,9')$<br><br>27966.12   | $(0,0,10')$<br><br>30538.71  | $(0,0,11')$<br><br>33048.71 |
